# Supplementary material
Source: PubMed Central journal article supplement (PMC2083282)
Supplement: NIHMS31126-supplement-table_3.pdf [file NIHMS31126-supplement-table_3.pdf]

Table 3  
Strengths and Difficulties Questionnaire (SDQ) scores of 733 custodial grandmothers, by grandchildren's gender and grandmothers' race

| SDQ scale <sup>a</sup>    | Grandchildren's Gender |     |                   |     |      |                 |       |                                  | Grandmothers' Race |                  |     |                  |     |      |                 |       |                                  |          |
|---------------------------|------------------------|-----|-------------------|-----|------|-----------------|-------|----------------------------------|--------------------|------------------|-----|------------------|-----|------|-----------------|-------|----------------------------------|----------|
|                           | Male<br>(N=342)        |     | Female<br>(N=391) |     | t    | df <sup>b</sup> | p     | Standardized<br>Effect Size (ES) |                    | White<br>(N=367) |     | Black<br>(N=366) |     | t    | df <sup>b</sup> | p     | Standardized Effect<br>Size (ES) |          |
|                           | M                      | SD  | M                 | SD  |      |                 |       | ES                               | 95% CI             | M                | SD  | M                | SD  |      |                 |       | ES                               | 95% CI   |
| Total Difficulties        | 13.1                   | 8.1 | 11.1              | 7.6 | 3.40 | 703             | .001  | .26                              | .11-.40            | 12.9             | 8.4 | 11.3             | 7.4 | 2.72 | 721             | .007  | .20                              | .06-.35  |
| Emotional Symptoms        | 2.6                    | 2.5 | 2.6               | 2.5 | .18  | 719             | .86   | .00                              | -.15-.15           | 2.9              | 2.6 | 2.3              | 2.2 | 3.64 | 713             | <.001 | .25                              | .10-.39  |
| Conduct Problems          | 2.8                    | 2.4 | 2.4               | 2.4 | 2.58 | 717             | .01   | .17                              | .02-.31            | 2.6              | 2.5 | 2.6              | 2.3 | .16  | 727             | .871  | .00                              | -.14-.14 |
| Hyperactivity Inattention | 5.0                    | 3.1 | 3.9               | 2.9 | 4.85 | 697             | <.001 | .37                              | .22-.51            | 4.7              | 3.2 | 4.1              | 2.9 | 2.64 | 724             | .009  | .20                              | .05-.34  |
| Peer Problems             | 2.7                    | 2.2 | 2.2               | 2.0 | 2.74 | 685             | .006  | .24                              | .09-.38            | 2.6              | 2.3 | 2.3              | 1.9 | 2.04 | 708             | .042  | .14                              | .00-.29  |
| Prosocial Behavior        | 7.4                    | 2.2 | 7.8               | 2.1 | 3.02 | 713             | .003  | .19                              | .04-.33            | 7.6              | 2.2 | 7.6              | 2.2 | .34  | 731             | .730  | .00                              | -.14-.14 |

<sup>a</sup> Possible scores for the total difficulties scale range from 0 to 40. Possible scores for all other SDQ subscales range from 0 to 10. For all SDQ scales, higher scores indicate greater levels of the measured construct.

<sup>b</sup>Equal variances not assumed
