# Supplementary material
Source: PubMed Central journal article supplement (PMC2083282)
Supplement: NIHMS31126-supplement-table_4.pdf [file NIHMS31126-supplement-table_4.pdf]

**Table 4**Summary for mean comparisons of Strengths and Difficulties Questionnaire (SDQ) scores,<sup>a</sup> by sample type

| SDQ scale                    | C <sup>b</sup><br>(N=387) | P <sup>c</sup><br>(N=346) | N <sup>d</sup> (N=9,878) | Mean comparisons, by group |                 |      |                        |            |                 |     |                        |            |                 |      |                        |       |     |         |
|------------------------------|---------------------------|---------------------------|--------------------------|----------------------------|-----------------|------|------------------------|------------|-----------------|-----|------------------------|------------|-----------------|------|------------------------|-------|-----|---------|
|                              |                           |                           |                          | C versus P                 |                 |      |                        | C versus N |                 |     |                        | P versus N |                 |      |                        |       |     |         |
|                              |                           |                           |                          | t                          | df <sup>e</sup> | p    | ES <sup>f</sup> 95% CI | t          | df <sup>e</sup> | p   | ES <sup>f</sup> 95% CI | t          | df <sup>e</sup> | p    | ES <sup>f</sup> 95% CI |       |     |         |
| Total difficulties           | 13.0±7.9                  | 11.0±7.9                  | 7.1±5.7                  | 3.35                       | 722             | .001 | .25                    | .11-.40    | 14.54           | 401 | <.001                  | 1.02       | .91-1.12        | 9.10 | 357                    | <.001 | .67 | .57-.78 |
| Emotional symptoms           | 2.8±2.4                   | 2.4±2.5                   | 1.6±1.8                  | 1.83                       | 718             | .068 | .16                    | .02-.31    | 9.73            | 403 | <.001                  | .66        | .56-.76         | 5.90 | 357                    | <.001 | .44 | .33-.54 |
| Conduct problems             | 2.9±2.4                   | 2.4±2.5                   | 1.6±1.8                  | 3.30                       | 731             | .001 | .25                    | .11-.40    | 12.49           | 398 | <.001                  | .97        | .87-1.08        | 8.38 | 357                    | <.001 | .62 | .51-.72 |
| Hyperactivity or inattention | 4.8±3.0                   | 4.1±3.0                   | 2.8±2.5                  | 3.12                       | 720             | .002 | .23                    | .09-.38    | 12.94           | 407 | <.001                  | .79        | .69-.90         | 7.96 | 361                    | <.001 | .52 | .41-.62 |
| Peer problems                | 2.6±2.1                   | 2.2±2.1                   | 1.4±1.5                  | 2.28                       | 724             | .023 | .19                    | .04-.34    | 11.13           | 401 | <.001                  | .79        | .68-.89         | 7.02 | 357                    | <.001 | .52 | .42-.63 |
| Prosocial behavior           | 7.5±2.3                   | 7.7±2.0                   | 8.6±1.8                  | 1.51                       | 731             | .133 | .05                    | .09-.24    | 9.30            | 404 | <.001                  | .60        | .50-.71         | 8.25 | 364                    | <.001 | .50 | .39-.61 |

<sup>a</sup> Possible scores for the total difficulties scale range from 0 to 40. Possible scores for all other SDQ subscales range from 0 to 10. For all SDQ scales, higher scores indicate greater levels of the measured construct.

<sup>b</sup> Convenience sample

<sup>c</sup> Population-based sample

<sup>d</sup> Normative sample from the National Health Interview Survey

<sup>e</sup> Equal variances not assumed

<sup>f</sup> Standardized effect size
